# Supplementary material
Source: MDPI journal article supplement (https://www.mdpi.com/2079-9292/12/2/320)
Supplement: s1 [file s1]

# A Wireless Intelligent Motion Correction System for the Skating Monitoring Based on Triboelectric Nanogenerator

Zhuo Lu <sup>1</sup>, Yuzhang Wen <sup>2</sup>, Xu Yang <sup>4</sup>, Dan Li <sup>5</sup>, Bocong Liu <sup>1</sup>, Yaotian Zhang <sup>1</sup>, Jiabin Zhu <sup>6</sup>, Yongsheng Zhu <sup>2,\*</sup>, Shouwei Zhang <sup>1,\*</sup> and Yupeng Mao <sup>1,2,3,\*</sup>

<sup>1</sup> School of Physical Education, Northeast Normal University, Changchun 130024, China;  
luz560@nenu.edu.cn (Z.L.); liubc060@nenu.edu.cn (B.L.); Zhangyt793@nenu.edu.cn (Y.Z.)

<sup>2</sup> Physical Education Department, Northeastern University, Shenyang 110819, China;  
2201361@stu.neu.edu.cn (Y.W.)

<sup>3</sup> School of Strength and Conditioning Training, Beijing Sport University, Beijing 100084, China;

<sup>4</sup> Changchun Polytechnic Tourism School, Changchun 130022, China;  
yangxu0316@126.com (X.Y.)

<sup>5</sup> Physical Education College, Jilin University, Changchun 130012, China;  
ldan@liu.edu.cn (D.L.)

<sup>6</sup> Winter Olympic College, Harbin sport university, Harbin 150008, China;  
hty\_20210429@126.com (J.Z.)

\* Correspondence: 2001276@stu.neu.edu.cn (Y.Z.); zhangsw178@nenu.edu.cn (S.Z.); maoyupeng@pe.neu.edu.cn (Y.M.)

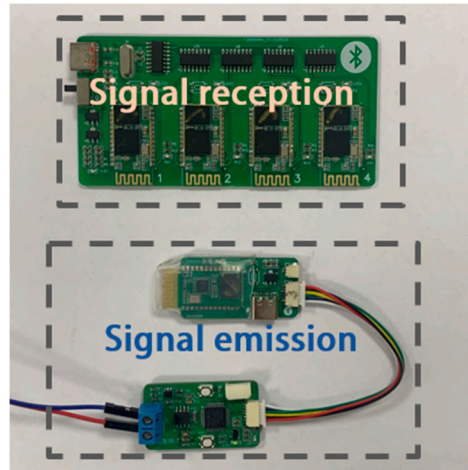

**Figure S1.** The actual diagram of AD module.

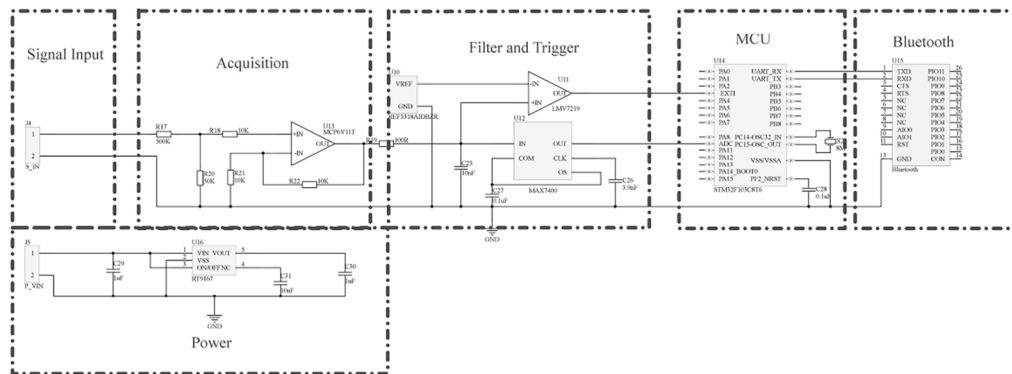

**Figure S2.** The circuit diagram of AD module.

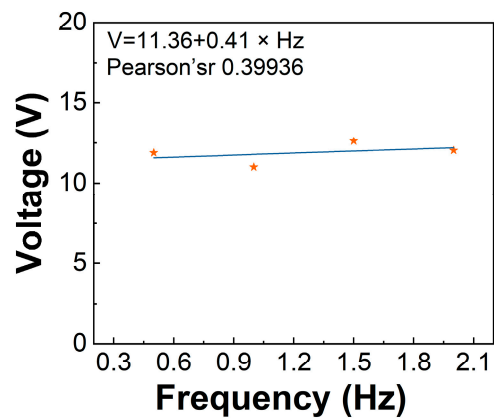

**Figure S3.** Output voltage and linear relationship of LPS-TENG under the same force and different frequencies.

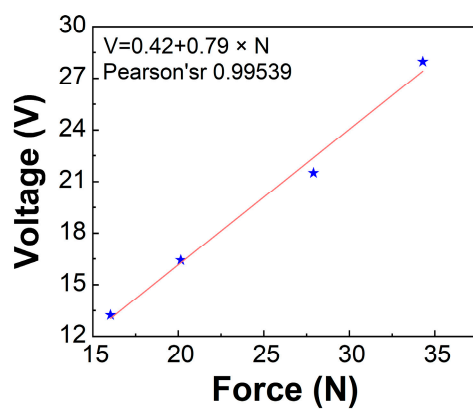

**Figure S4.** Output voltage and linear relationship of LPS-TENG under the same frequency and different forces.

**Video S1.** Real-time out voltage of LPS-TENG during motion;

**Video S2.** Different feedback results of wireless intelligent motion correction system.
